# Supplementary material for: Targeted demethylation of cathepsin D via epigenome editing rescues pathology in Alzheimer's disease mouse model
Source: PubMed Central journal article supplement (PMC11671390; doi:10.7150/thno.103455), 2025-01-01
Supplement: thnov15p0428s1.pdf [file thnov15p0428s1.pdf]

## Supplementary Figure 1

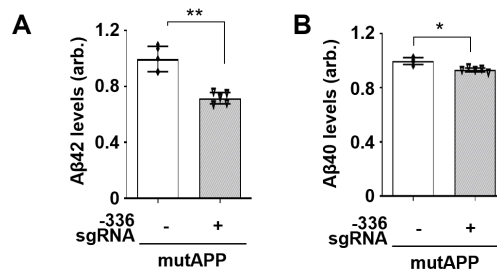

### Supplementary Figure 1. Quantification of Aβ42 and Aβ40 levels in mutAPP primary neurons.

(A) ELISA analysis of Aβ42 levels in mutAPP mouse primary neurons transduced with -336 sgRNA and dCas9-Tet1. Data are presented as mean ± SEM (n = 5). \*\* $p < 0.01$ , two-tailed unpaired t-tests. (B) ELISA analysis of Aβ40 levels in mutAPP mouse primary neurons transduced with -336 sgRNA and dCas9-Tet1. Data are expressed as mean ± SEM (n = 5). \* $p < 0.05$ , two-tailed unpaired t-tests.

## Supplementary Figure 2

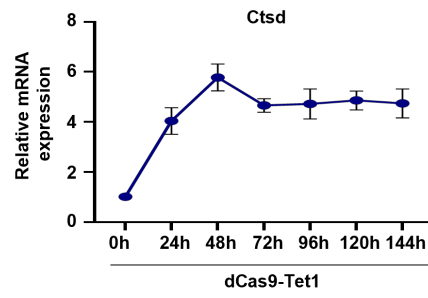

**Supplementary Figure 2. Verification of sustained gene activation in mouse brain following dCas9-Tet1 injection.** Samples were analyzed at 24, 48, 72, 96, 120, and 144 hours post-injection.

### Supplementary Figure 3

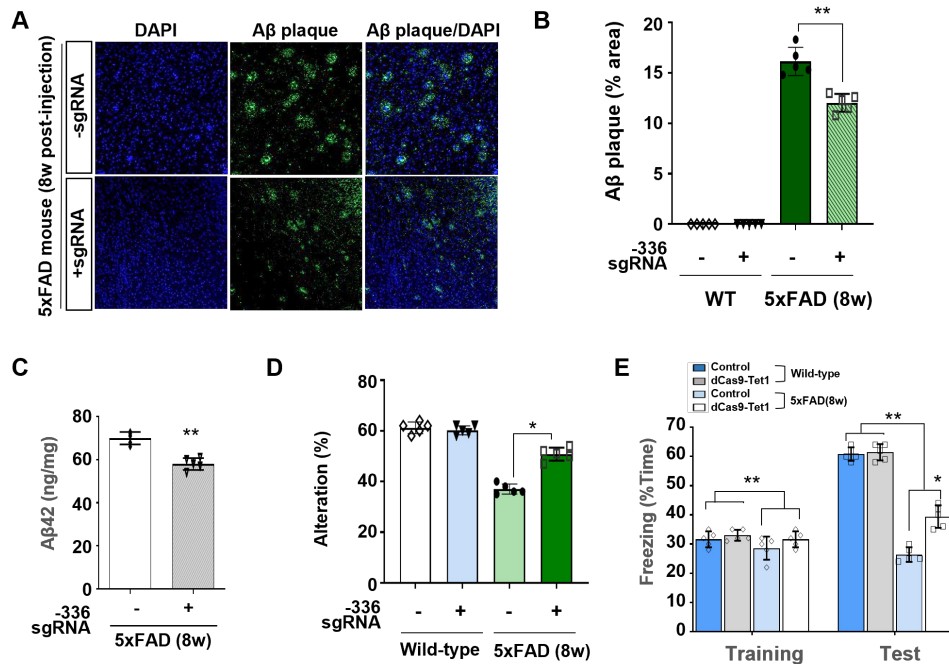

**Supplementary Figure 3. Longitudinal effects of dCas9-Tet1-injected 5xFAD mouse model.** (A) Immunostaining for ThT in -336 sgRNA and dCas9-Tet1 injected 5xFAD mice on 8 weeks post-injection. (B) Percentage of Aβ plaque in -336 sgRNA and dCas9-Tet1 injected 5xFAD mouse on 8 weeks post-injection. Data are shown as mean ± SEM (n = 5). \*\**p* < 0.01, two-tailed unpaired t-tests. (C) Levels of Aβ42 measured by ELISA in -336 sgRNA and dCas9-Tet1 injected 5xFAD mice on 8 weeks post-injection. Data are shown as mean ± SEM (n = 5). \*\*\**p* < 0.001, two-tailed unpaired t-tests. (D) Y-maze test of -336 sgRNA and dCas9-Tet1 injected 5xFAD on 8 weeks post-injection. Data are shown as mean ± SEM. \*\**p* < 0.01, two-way ANOVA with Tukey's multiple comparisons test. (E) Fear conditioning test of -336 sgRNA and dCas9-Tet1 injected 5xFAD mice on 8 weeks post-injection. Data are shown as mean ± SEM. \*\**p* < 0.01, two-way ANOVA with Tukey's multiple comparisons test. Image in panel A is representative of three or more similar experiments.

### Supplementary Table 1

| Target     | Sequence                | Chromosome | Position  |
|------------|-------------------------|------------|-----------|
| -336 sgRNA | TATGCAAAAAAGACAGATTAAGG | Chr.7      | 142387747 |
| -239 sgRNA | ACCTGTATCCAGTCATTCTCCGG | Chr.7      | 142387758 |
| -151 sgRNA | GCCCGGGCAGTGTGGAGGCGGG  | Chr.7      | 142387745 |

**Supplementary Table 1. sgRNA sequences targeting Ctsd.**

## Supplementary Table 2

| No. | Target                   | Chromosome | Position  | Direction | Gene  |
|-----|--------------------------|------------|-----------|-----------|-------|
| OF1 | TATGTCAAAAcAGAAAGATTATGG | Chr8       | 22288595  | -         | Tpte  |
| OF2 | TATGCAAATAAAcACAGATaAAGG | ChrX       | 56197821  | +         | Gm773 |
| OF3 | TATGtAAAAAAGACAAGAgTATGG | Chr10      | 109862984 | -         | Nav3  |
| OF4 | aCATiCAAAAAGACAGATTAAGG  | Chr18      | 89741195  | +         | Dok6  |
| OF5 | gATGCAAcAAAGACAGACTTAAGG | Chr19      | 34118103  | -         | Lipm  |

**Supplementary Table 2. Predicted Ctsd off-target sites for -336 sgRNA.** Off-target sites are those with no more than two mismatches compared to on-target sequences. OF, off-target.
